# Supplementary material
Source: Springer Nature journal article supplement (https://www.springermedizin.de/resource/supplementary/13002_2014_426_MOESM2_ESM.pdf/9626896)

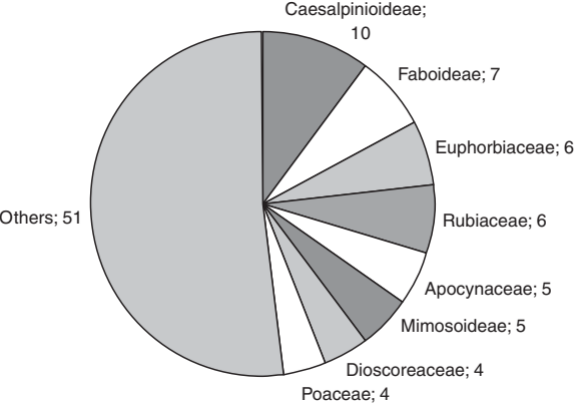

Supplement: MOESM2 [file 9626896]
